# Supplementary material for: Prevalence, Geographic Distribution, Risk Factors and Co-Infections of Feline Gammaherpesvirus Infections in Domestic Cats in Switzerland
Source: MDPI journal article supplement (doi:10.3390/v11080721), 2019-08-06
Supplement: s1 [file s1]

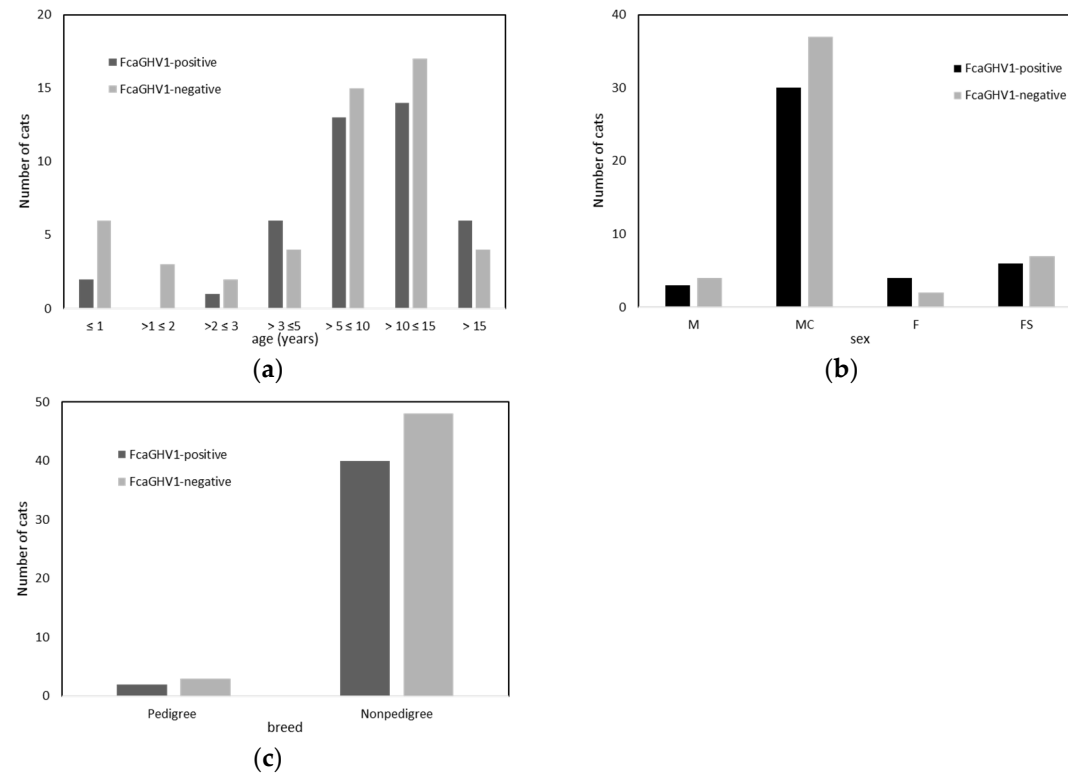

**Figure S1.** Characteristics of the matched 53 FcaGHV1-negative cats selected for testing for other infections and comparison with the 53 FcaGHV1-positive cats. The 106 tested samples of the 881 blood samples included 53 FcaGHV1 PCR-positive samples and 53 FcaGHV1 PCR-negative samples. The FcaGHV1 PCR-negative samples were matched to the FcaGHV1 PCR-positive samples based on the origin (Swiss canton of provenience), age (a), sex (b) and pedigree status (c) of the cat. There was no significant difference between FcaGHV1 PCR-negative and -positive cats regarding sex ( $p\text{Chi}2 = 0.9171$ ), percentage of pedigree cats ( $p\text{Chi}2 = 1.000$ ) and age ( $p\text{Chi}2 = 0.0794$ ). M, male; MC, male castrated; F, female; FS, female spayed.
